# Supplementary material for: β-arrestin 2 as an activator of cGAS-STING signaling and target of viral immune evasion
Source: PubMed Central journal article supplement (PMC7691508; doi:10.1038/s41467-020-19849-9), 2020-11-26
Supplement: 41467_2020_19849_MOESM1_ESM.pdf [file 41467_2020_19849_MOESM1_ESM.pdf]

# Supplementary Information for

## **$\beta$ -arrestin 2 as an activator of cGAS-STING signaling and target of viral immune evasion**

Yihua Zhang<sup>1,†</sup>, Manman Li<sup>1,†</sup>, Liuyan Li<sup>1</sup>, Gui Qian<sup>1</sup>, Yu Wang<sup>2</sup>, Zijuan Chen<sup>1</sup>,  
Jing Liu<sup>1</sup>, Chao Fang<sup>3</sup>, Feng Huang<sup>4</sup>, Daqiao Guo<sup>3</sup>, Quanming Zou<sup>2</sup>, Yiwei Chu<sup>1</sup>  
& Dapeng Yan<sup>1\*</sup>

<sup>1</sup>Department of Immunology, School of Basic Medical Sciences & Shanghai Public Health Clinical Center, Key Laboratory of Medical Molecular Virology of MOE/MOH, Fudan University, Shanghai 200032, China

<sup>2</sup>Department of Microbiology and Biochemical Pharmacy, National Engineering Research Centre of Immunological Products, College of Pharmacy, Army Medical University, Chongqing 400038, China

<sup>3</sup>Department of Vascular Surgery, Zhongshan Hospital Affiliated to Fudan University, Institute of Vascular Surgery, Fudan University, Shanghai 200032, China

<sup>4</sup>Beijing Hospital of Traditional Chinese Medicine, Capital Medical University, Beijing 100010, China

<sup>†</sup>These authors contributed equally to this work.

\* Correspondence should be addressed to D. Y. ([dapengyan@fudan.edu.cn](mailto:dapengyan@fudan.edu.cn))

### **This PDF file includes:**

Supplementary Fig. 1 to 6

Supplementary Table 1

## Supplementary Figures

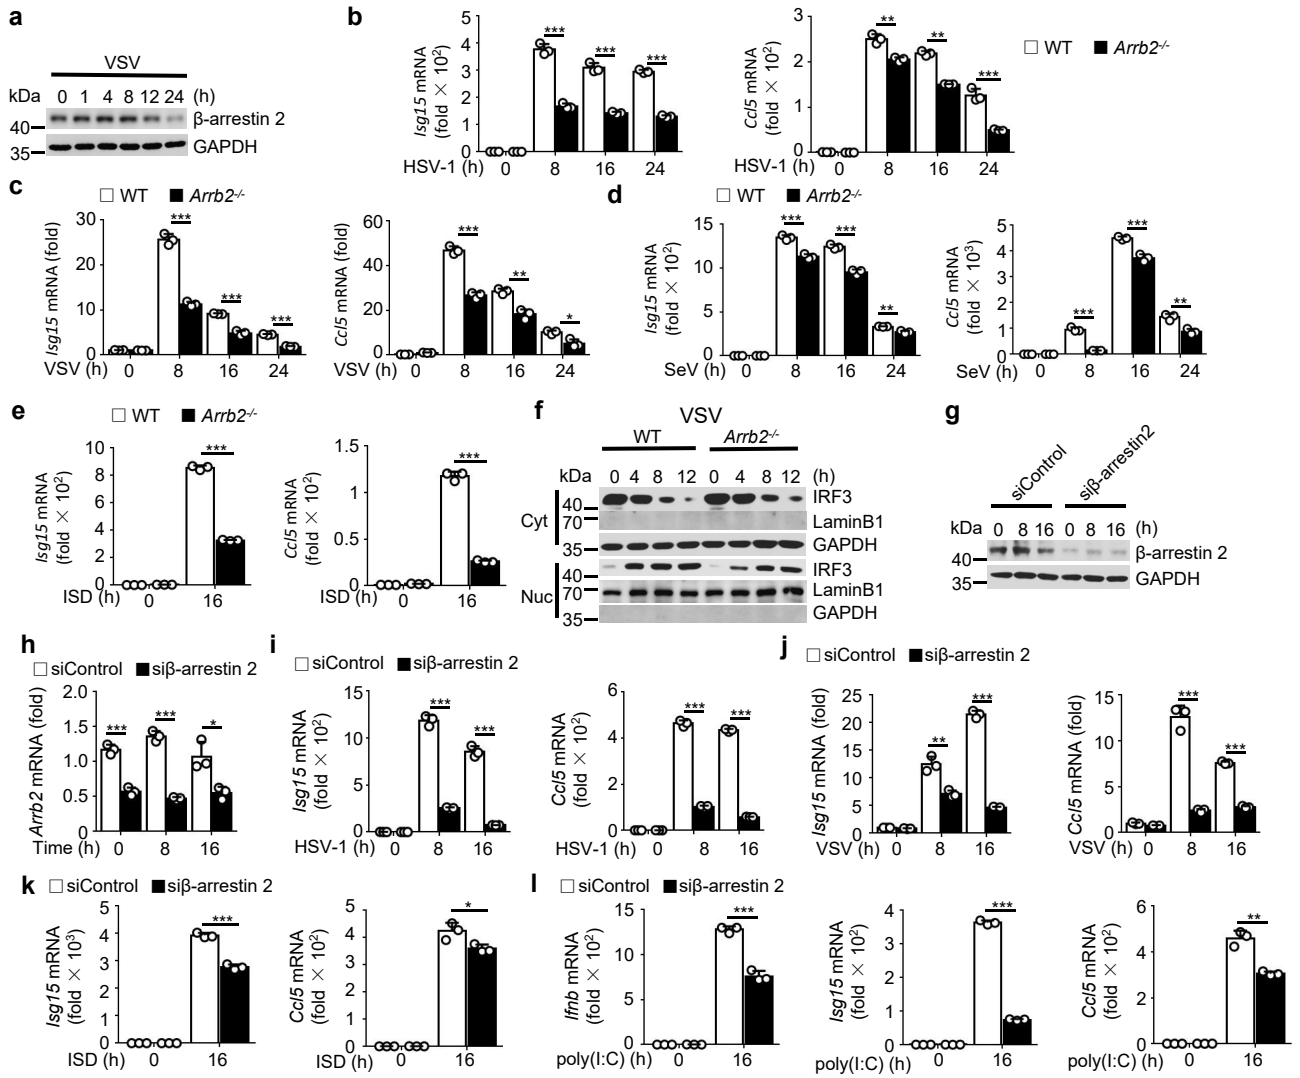

### Supplementary Fig. 1: β-arrestin 2 promoted the antiviral immune response. (a)

Immunoblot of lysates of peritoneal macrophages infected with VSV for indicated times. (b–e) *Isg15* and *Cxcl10* mRNA levels in WT or *Arrb2*<sup>-/-</sup> mouse peritoneal macrophages stimulated with HSV-1 (b) (\*\*\*) *P* < 0.0001, < 0.0001, < 0.0001 in sequence, left panel; \*\* *P* = 0.0025, \*\*\* *P* < 0.0001, \*\* *P* = 0.0007, right panel), VSV (c) (\*\*\*) *P* < 0.0001, = 0.0001, < 0.0001 in sequence, left panel; \*\*\* *P* < 0.0001, \*\* *P* = 0.0020, \* *P* = 0.0125, right panel), SeV (d) (\*\*\*) *P* = 0.000, 0.0002 in sequence, \*\* *P* = 0.0024, left panel; \*\*\* *P* < 0.0001, = 0.0009 in sequence, \*\* *P* = 0.0035, right panel), or ISD (e) (\*\*\*) *P* < 0.0001 in all panels) for indicated times. (f) Immunoblot analysis of nuclear and cytoplasmic fractions as in WT or *Arrb2*<sup>-/-</sup> mouse peritoneal macrophages infected with VSV for indicated times. (g) Immunoblot of lysates of RAW264.7 cells treated with control siRNA or siβ-arrestin 2 and infected with HSV-1 for indicated times. (h) *Arrb2*<sup>-/-</sup> mRNA levels in RAW264.7 cells treated with control siRNA or siβ-arrestin 2 and infected with HSV-1 for indicated times (\*\*\*) *P* = 0.0003, \*\*\* *P* < 0.0001, \* *P* = 0.0164). (i–l) *Ifnb*, *Isg15*, and *Cxcl10* mRNA levels in RAW264.7 cells transfected with control siRNA or β-arrestin 2 siRNA and then stimulated with HSV-1 (i) (\*\*\*) *P* < 0.0001 in all panels), VSV (j) (\*\* *P* = 0.0035, \*\*\* *P* < 0.0001 left panel; \*\*\* *P* = 0.0001, \*\*\* *P* < 0.0001, right panel), ISD (k) (\*\*\*) *P* = 0.0001, left panel; \*\* *P* = 0.0306, right panel), or poly(I:C) (l) (\*\*\*) *P* = 0.0002, left panel; \*\*\* *P* < 0.0001, middle panel; \*\* *P* = 0.0014, right panel) for indicated times. Data are representative of at least three independent experiments (mean ± SEM in b–e, h–l, *n* = 3). Two-tailed unpaired Student's *t*-test.

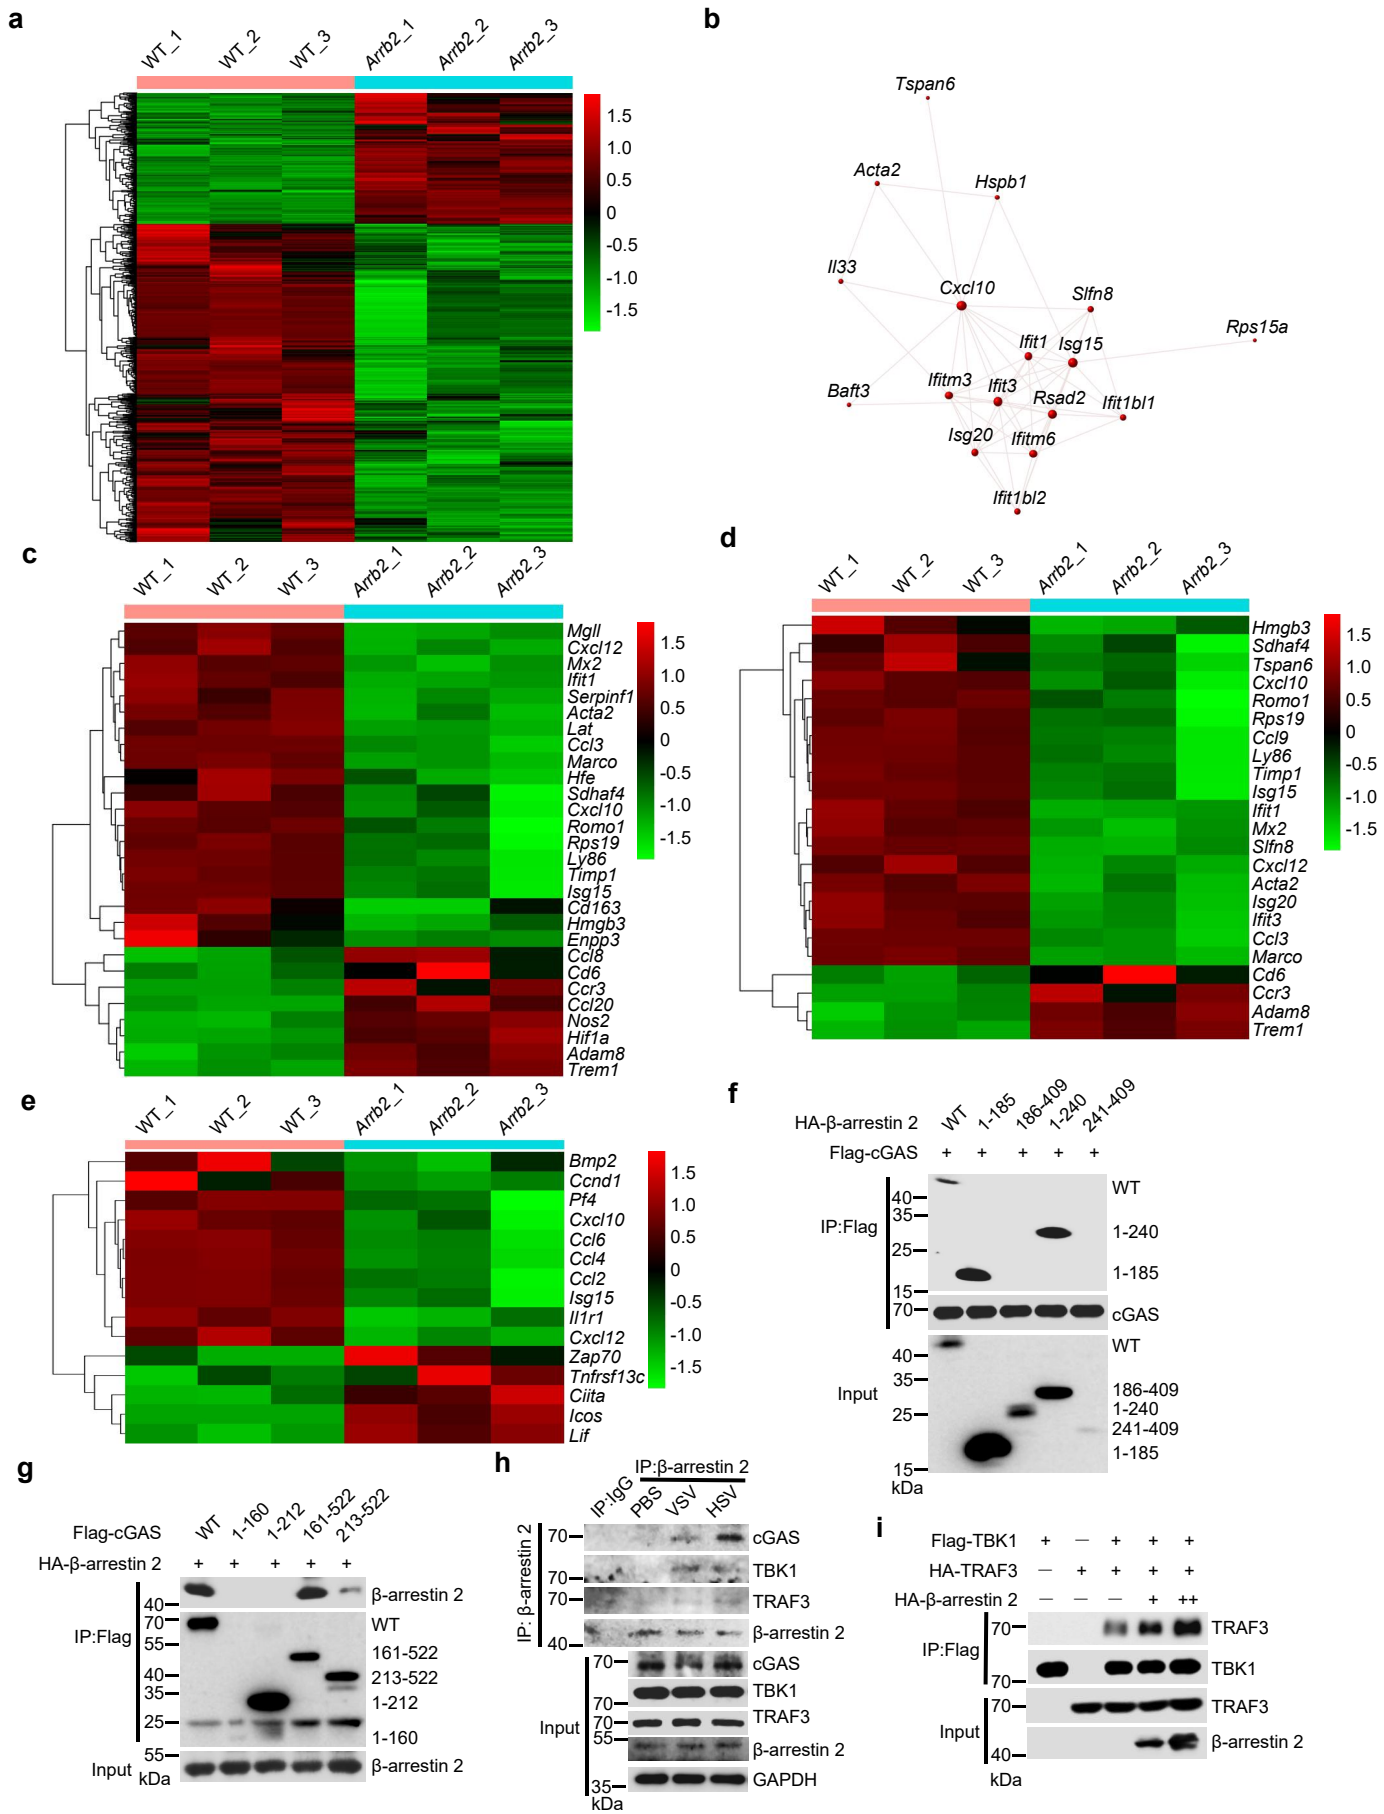

**Supplementary Fig. 2:  $\beta$ -arrestin 2 mediated the modulation of host antiviral transcriptional program during HSV-1 infection.** (a) Heatmap shown the differentially expressed genes (fold change > 2 and p-value < 0.05). (b) Network model based on differential expressed genes. (c) Heatmap of the differential expressed genes involved in antiviral signaling pathway. (d) Heatmap of differential genes involved in the terms in red as in Figure 4b. (e) Heatmap of differential genes involved in the terms in red as in Figure 4c. (f) Co-immunoassay of lysates of HEK293T cells expressing  $\beta$ -arrestin 2 truncations and cGAS. (g) Co-immunoassay of HEK293T cells expressing cGAS truncations and  $\beta$ -arrestin 2. (h) Immunoassay of lysates of peritoneal macrophages infected with HSV-1 or VSV. (i) Immunoassay of HEK293T cells expressing various vectors. Data are representative of at least three independent experiments.

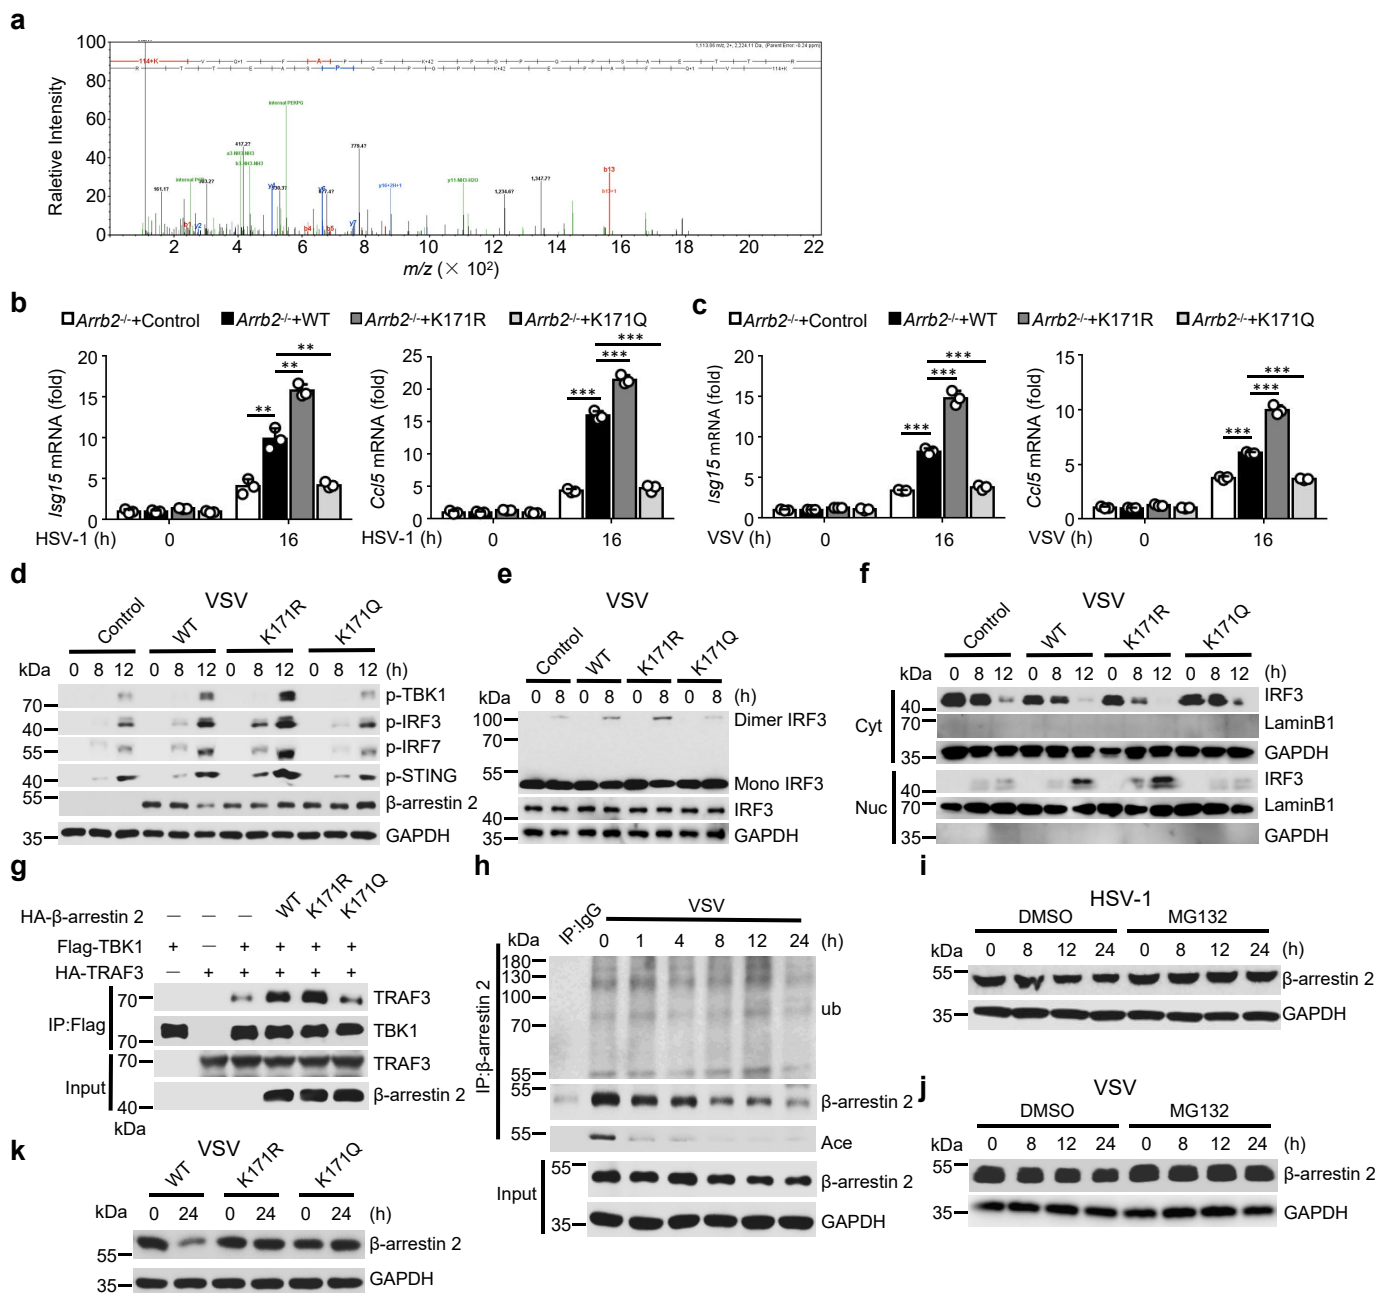

### Supplementary Fig. 3: Lys171 was the pivotal regulation residue of $\beta$ -arrestin 2.

(a) Mass spectrometry analysis of a  $\beta$ -arrestin 2 peptide modified with acetylation. (b, c) *Ifnb*, *Isg15*, and *Il6* mRNA levels in *Arrb2*<sup>-/-</sup> MEFs transfected with control vector,  $\beta$ -arrestin 2, or  $\beta$ -arrestin 2 mutants and infected with HSV-1 (b) (\*\**P* = 0.0030, 0.0025, 0.0018 in sequence, left panel; \*\*\**P* < 0.0001, = 0.0006, < 0.0001 in sequence, right panel) or VSV (c) (\*\*\**P* < 0.0001, = 0.0003, < 0.0001 in sequence, left panel; \*\*\**P* < 0.0001, < 0.0001, < 0.0001 in sequence, right panel) for 16 h. (d) Immunoassay of lysates of *Arrb2*<sup>-/-</sup> MEFs transfected as in (c) and infected with VSV for indicated times. (e) Immunoblot analysis of monomeric and dimeric IRF3 as in (d). (f) Immunoblot analysis of nuclear and cytoplasmic fractions as in (d). (g) Immunoassay of HEK293T cells expressing various vectors. (h) Immunoassay of lysates of peritoneal macrophages infected with VSV for indicated times. (i, j) Immunoassay of lysates of peritoneal macrophages infected with HSV-1 (i) and VSV (j) for indicated times and treated with MG132 before lysed. (k) Immunoassay of lysates as in (d) for 24 h. Data are representative of at least three independent experiments (mean  $\pm$  SEM in b, c, *n* = 3). Two-tailed unpaired Student's *t*-test.

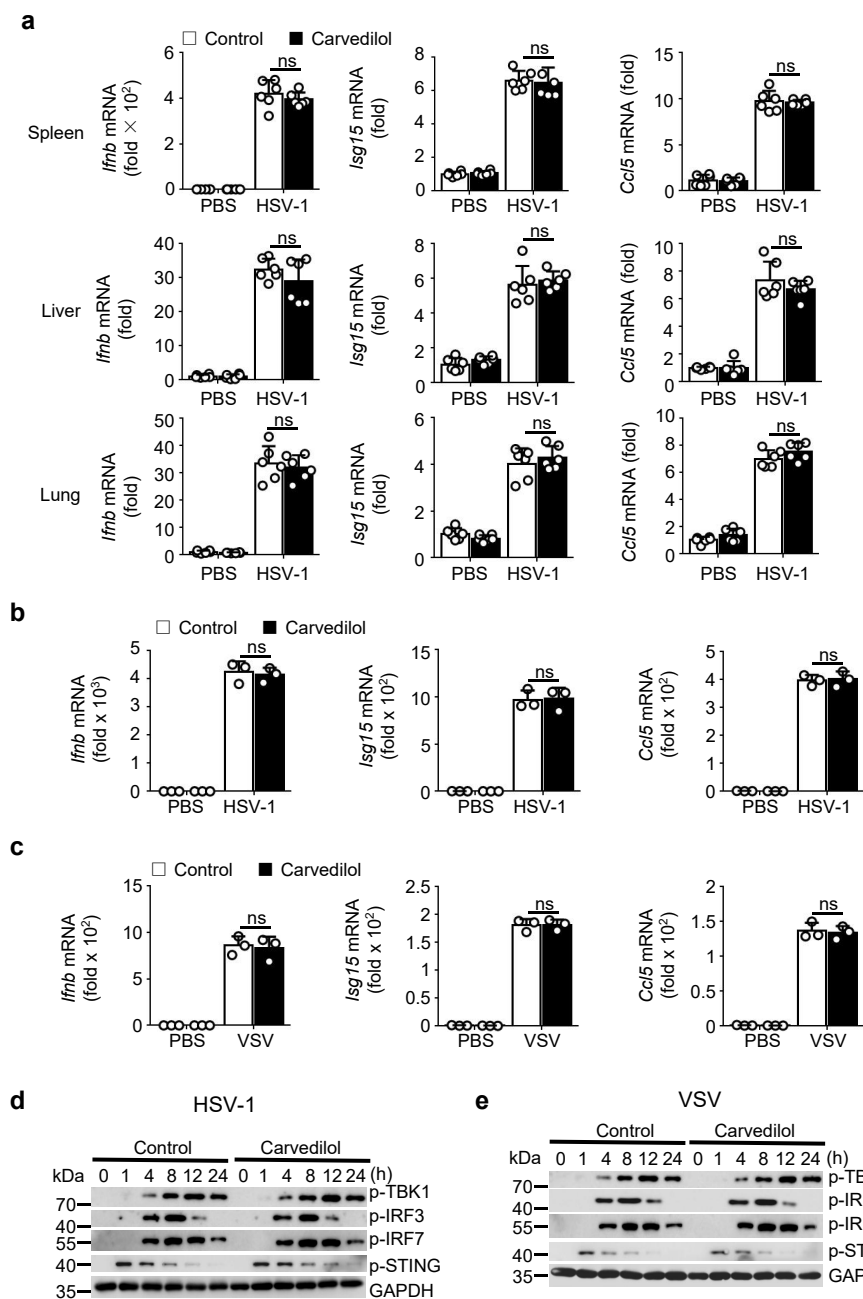

**Supplementary Fig. 4: Carvedilol has no effect on *Arrb2*<sup>-/-</sup> mice and *Arrb2*<sup>-/-</sup> cells.** (a) *Ifnb*, *Isg15*, and *Ccl5* mRNA levels in the spleens, livers, and lungs of *Arrb2*<sup>-/-</sup> 6-week-old-male mice ( $n = 6$  per group) intraperitoneally injected with PBS or HSV-1 ( $2 \times 10^7$  PFU per mouse) for 24 h and then treated with PBS or carvedilol for another 24 h. (b, c) *fnb*, *ISG15*, and *Ccl5* mRNA in *Arrb2*<sup>-/-</sup> peritoneal macrophages infected for 16 h with HSV-1 (b) or VSV (c) and then treated with PBS or carvedilol,  $n = 3$ . (d, e) Immunoblot of lysates of peritoneal macrophages from *Arrb2*<sup>-/-</sup> mice infected with HSV-1 (d) or VSV (e) for indicated times and treated with PBS or carvedilol. Data are representative of at least three independent experiments (mean  $\pm$  SEM in a–c).  $ns > 0.05$ , two-tailed unpaired Student's *t*-test.

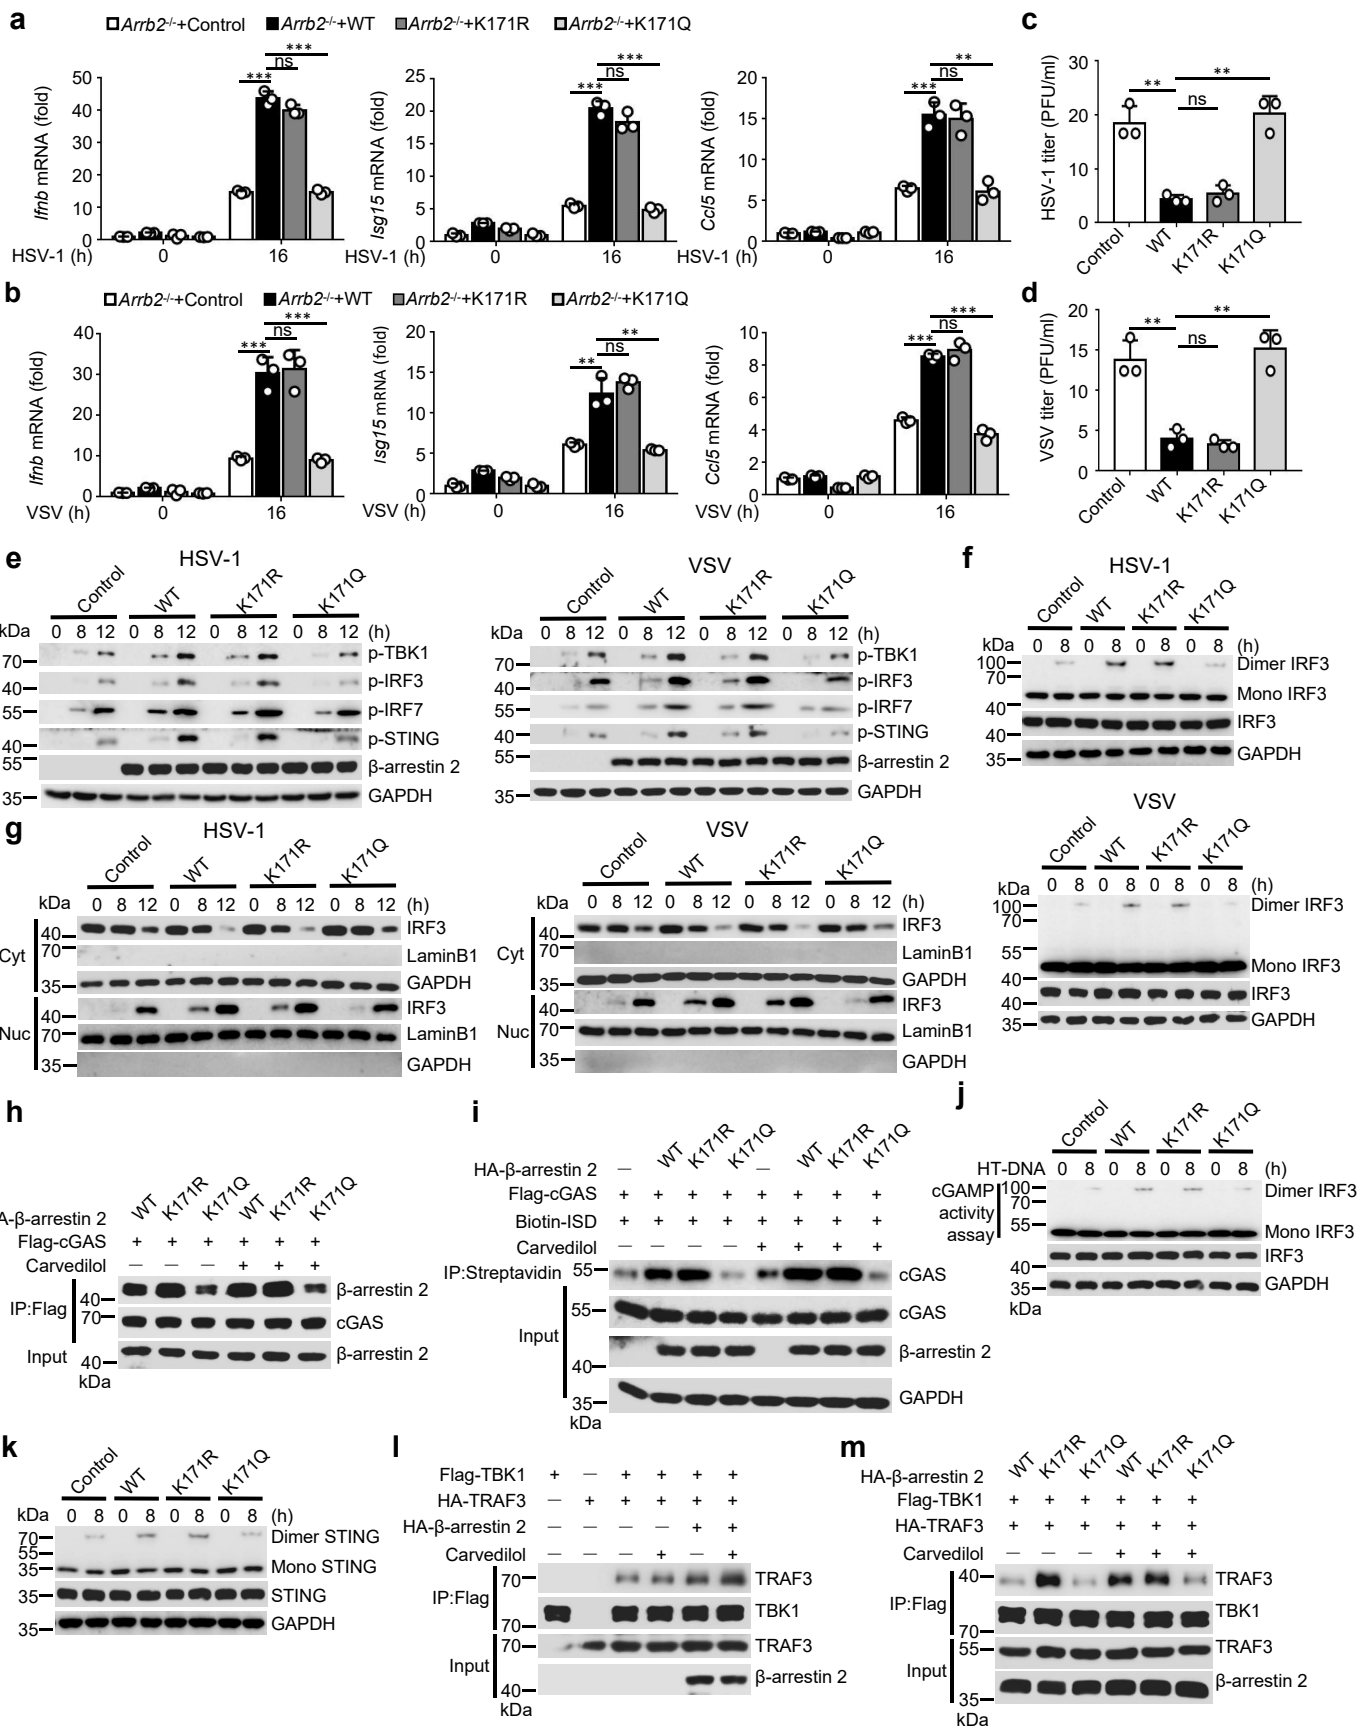

**Supplementary Fig. 5: Carvedilol activated  $\beta$ -arrestin 2 through Lys171.** (a, b) *Ifnb*, *Isg15*, and *Ccl5* mRNA levels in *Arrb2*<sup>-/-</sup> MEFs transfected with control vector,  $\beta$ -arrestin 2, or  $\beta$ -arrestin 2 mutants, infected with HSV-1 (a) ( $***P < 0.0001$ ,  $< 0.0001$  in sequence, left panel;  $***P < 0.0001$ ,  $< 0.0001$  in sequence, middle panel;  $***P < 0.0001$ ,  $**P = 0.0012$ , right panel) or VSV (b) ( $***P = 0.0009$ ,  $0.0008$  in sequence, left panel;  $**P = 0.0051$ ,  $0.0035$  in sequence, middle panel;  $***P < 0.0001$ ,  $< 0.0001$  in sequence, right panel) for 16 h and treated with PBS or carvedilol. (c, d) The virus titers as in (a) and (b) for 72 h ( $**P = 0.0018$ ,  $0.0011$  in sequence in c,  $**P = 0.0031$ ,  $0.0018$  in sequence in d). (e) Immunoassay of lysates of *Arrb2*<sup>-/-</sup> MEFs transfected as in (a), infected with HSV-1 (left) and VSV (right) for indicated times and treated with PBS or carvedilol. (f) Immunoblot analysis of monomeric and dimeric IRF3 as in (a) and (b). (g) Immunoblot analysis of nuclear and cytoplasmic fractions as in (a) and (b). (h) Immunoassay of lysates of HEK293T cells expressing various vectors. (i) Immunoassay of cell lysates and streptavidin-precipitated proteins from HEK293T cells transfected with various vectors and stimulated with biotin-ISD. (j) cGAMP activity measured by extracts from HT-DNA-stimulated (6 h) WT and *Arrb2*<sup>-/-</sup> peritoneal macrophages. (k) Immunoblot analysis of monomeric and dimeric STING in *Arrb2*<sup>-/-</sup> MEFs transfected as in (a) infected with HSV-1 for indicated times and treated with PBS or carvedilol. (l) Immunoassay of lysates of HEK293T cells expressing various vectors. (m) Immunoassay of lysates of HEK293T cells expressing various vectors. Data are representative of at least three independent experiments (mean  $\pm$  SEM in a-d,  $n = 3$ ). Two-tailed unpaired Student's *t*-test.



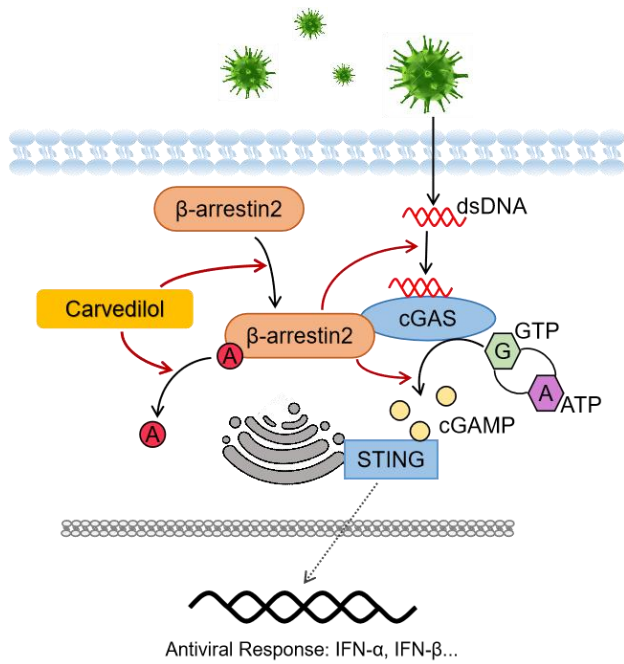

**Supplementary Fig. 6:**  
**Diagram depicting the Carvedilol-β-arrestin 2-cGAS-STING-TBK1-IRF3-Type I IFN axis.**

**Supplementary Table 1: Primer sequences used to amplify human gene and mouse gene in real-time quantitative PCR.**

|                     |         |                        |
|---------------------|---------|------------------------|
| Human <i>Ifnb</i>   | forward | TCTGGCACAACAGGTAGTAGGC |
|                     | reverse | GAGAAGCACAACAGGAG      |
| Human <i>Cxcl10</i> | forward | GGAACCTCCAGTCTCAGCACCA |
|                     | reverse | AGACATCTCTTCTCACCCCTTC |
| Human <i>Isg15</i>  | forward | TTTGCCAGTACAGGAGCTTGTG |
|                     | reverse | GGGTGATCTGCGCCTTCA     |
| Human <i>GAPDH</i>  | forward | GCAAATTCCATGGCACCGT    |
|                     | reverse | GCCCCACTTGATTTTGGAGG   |
| mouse <i>Ifnb</i>   | forward | AGTTACACTGCCTTTGCC     |
|                     | reverse | GTTGAGGACATCTCCAC      |
| mouse <i>Cxcl10</i> | forward | CCAAGTGCTGCCGTCATTTT   |
|                     | reverse | GATAGGCTCGCAGGGATGAT   |
| mouse <i>Isg15</i>  | forward | GGTGTCCGTGACTAACTCCAT  |
|                     | reverse | TGGAAAGGGTAAGACCGTCCT  |
| mouse <i>Gapdh</i>  | forward | CCCCTAACATCAAATGGGG    |
|                     | reverse | CCTTCCACAATGCCAAAGTT   |
